# Supplementary material for: Significantly enhancing the stability of a Cu2ZnSnS4 aqueous/ethanol-based precursor solution and its application in Cu2ZnSn(S,Se)4 solar cells
Source: Royal Society of Chemistry journal article supplement (doi:10.1039/c5ra23015b), 2015-01-01
Supplement: c5ra23015b1.pdf [file c5ra23015b1.pdf]

Electronic Supplementary Material (ESI) for RSC Advances.  
This journal is © The Royal Society of Chemistry 2015

**Significant Enhancing the Stability of  $\text{Cu}_2\text{ZnSnS}_4$  Aqueous/ethanol-based Precursor Solution and Its Application in  $\text{Cu}_2\text{ZnSn}(\text{S},\text{Se})_4$  Solar cells**

Zhen-Yu Xiao,<sup>a,b</sup> Yong-Feng Li,<sup>\*a,b</sup> Bin Yao,<sup>\*a,b</sup> Zhan-Hui Ding,<sup>b</sup> Rui Deng,<sup>c</sup> Hai-feng Zhao,<sup>d</sup> Li-gong Zhang,<sup>d</sup> Zhen-zhong Zhang<sup>d</sup>

<sup>a</sup>Key Laboratory of Physics and Technology for Advanced Batteries (Ministry of Education),  
College of Physics, Jilin University, Changchun, 130012, China

<sup>b</sup>State Key Lab of Superhard Materials, College of Physics, Jilin University, Changchun 130012,  
China

<sup>c</sup>School of Materials Science and Engineering, Changchun University of Science and Technology,  
Changchun, 130022, China

<sup>d</sup>State Key Laboratory of Luminescence and Applications, Changchun Institute of Optics, Fine  
Mechanics and Physics, Chinese Academy of Sciences, No. 3888 Dongnanhu Road, Changchun  
130033, PR China

\* E-mail: liyongfeng@jlu.edu.cn and [binyao@jlu.edu.cn](mailto:binyao@jlu.edu.cn)

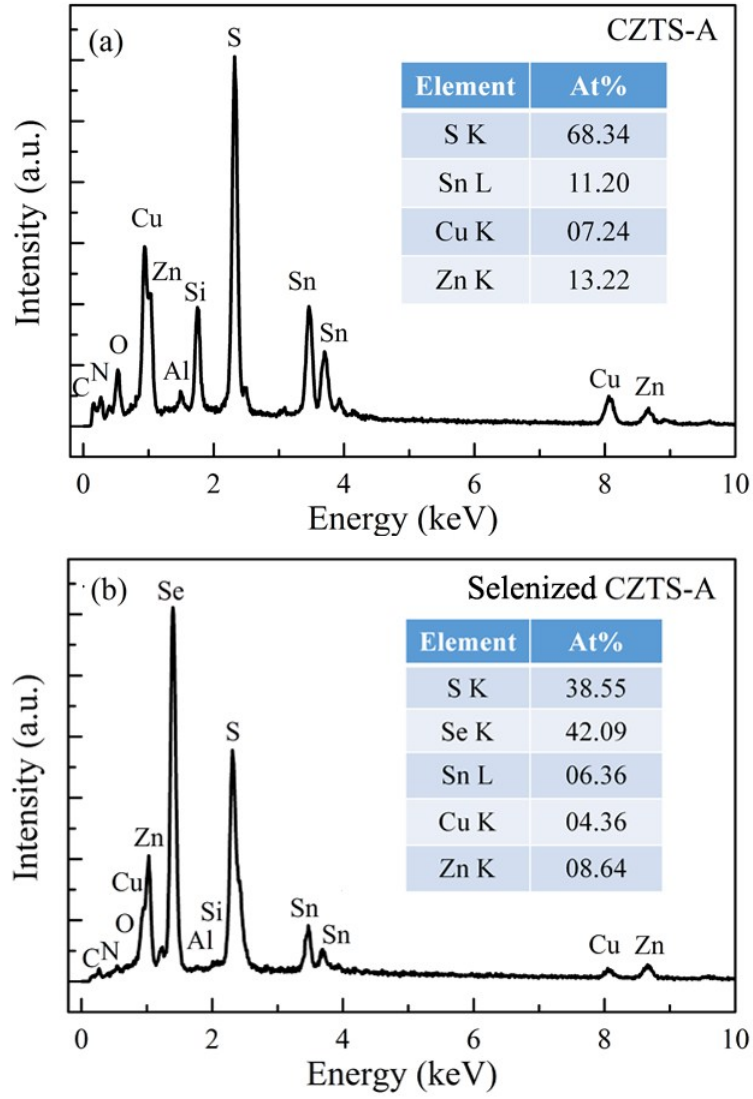

Fig. S1. EDS patterns of as-fabricated (a) and selenized (b) CZTS-A which was fabricated by spin-coating the precursor solution without MPA. The insets show the compositions.

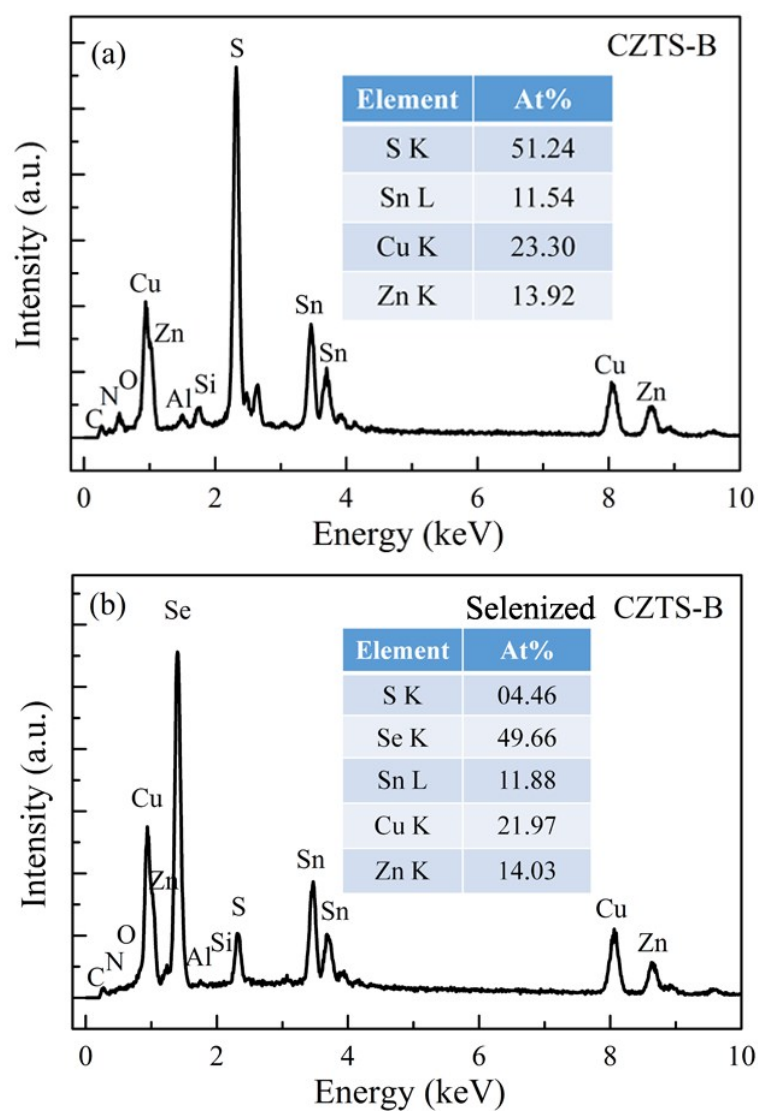

Fig. S2. EDS patterns of as-fabricated and selenized CZTS-B which was fabricated by spin-coating the precursor solution with MPA. The insets show the compositions.
